# Supplementary material for: Biocrude Production Using a Novel Cyanobacterium: Pilot-Scale Cultivation and Lipid Extraction via Hydrothermal Liquefaction
Source: MDPI journal article supplement (doi:10.3390/su15064878), 2023-03-09
Supplement: s1 [file s1]

Growth at Day 15

| <b>Descriptive statistics of your k=3 independent treatments:</b> |              |              |               |              |         |
|-------------------------------------------------------------------|--------------|--------------|---------------|--------------|---------|
| Treatment →                                                       | Bioreactor 1 | Bioreactor 2 | Bioreactor 3  | Pooled Total |         |
| Observations N                                                    | 3            | 3            | 3             | 9            |         |
| Sum                                                               | 1.66         | 1.682        | 1.689         | 5.031        |         |
| Mean                                                              | 0.5533       | 0.5607       | 0.563         | 0.559        |         |
| Sum Of Squares                                                    | 0.9187       | 0.9431       | 0.951         | 2.8127       |         |
| Sample Variance S                                                 | 0.0001       | 0            | 0             | 0.0001       |         |
| Sample Std. Dev. S                                                | 0.0078       | 0.006        | 0.0053        | 0.0071       |         |
| Std. Dev. Of Mean                                                 | 0.0045       | 0.0035       | 0.0031        | 0.0024       |         |
| <b>One-Way ANOVA Of Your K=3 Independent Treatments:</b>          |              |              |               |              |         |
| Source                                                            | sum of       | degrees of   | mean square   | F statistic  | p-value |
|                                                                   | squares SS   | freedom v    | MS            |              |         |
| Treatment                                                         | 0.0002       | 2            | 0.0001        | 1.8369       | 0.2386  |
| Error                                                             | 0.0002       | 6            | 0             |              |         |
| Total                                                             | 0.0004       | 8            |               |              |         |
| <b>Tukey HSD Results</b>                                          |              |              |               |              |         |
| Treatments                                                        | Tukey HSD    | Tukey HSD    | Tukey HSD     |              |         |
| Pair                                                              | Q statistic  | p-value      | inference     |              |         |
| B1 Vs B2                                                          | 1.9704       | 0.4023924    | insignificant |              |         |
| B1 Vs B3                                                          | 2.5973       | 0.2364134    | insignificant |              |         |
| B2 Vs B3                                                          | 0.6269       | 0.8947191    | insignificant |              |         |

Table S1: Growth of *Fremyella diplosiphon* SF-33 grown in 20 L bioreactors: Greenhouse 15 L culture on day 15.

| <b><i>Descriptive Statistics Of Your Kk=3 Independent Treatments:</i></b> |                   |                      |                |              |         |
|---------------------------------------------------------------------------|-------------------|----------------------|----------------|--------------|---------|
| Treatment →                                                               | Bioreactor 1      | Bioreactor 2         | Bioreactor 3   | Pooled Total |         |
| Observations N                                                            | 3                 | 3                    | 3              | 9            |         |
| Sum                                                                       | 1.5790            | 1.5700               | 1.5990         | 4.7480       |         |
| Mean                                                                      | 0.5263            | 0.5233               | 0.5330         | 0.5276       |         |
| Sum Of Squares                                                            | 0.8311            | 0.8217               | 0.8524         | 2.5052       |         |
| Sample Variance Ss                                                        | 0.0000            | 0.0001               | 0.0001         | 0.0000       |         |
| Sample Std. Dev. Ss                                                       | 0.0040            | 0.0075               | 0.0072         | 0.0070       |         |
| Std. Dev. Of Mean                                                         | 0.0023            | 0.0043               | 0.0042         | 0.0023       |         |
| <b><i>One-Way ANOVA Of Your Kk=3 Independent Treatments:</i></b>          |                   |                      |                |              |         |
| Source                                                                    | sum of squares SS | degrees of freedom v | mean square MS | F statistic  | p-value |
| Treatment                                                                 | 0.0001            | 2.0000               | 0.0001         | 1.7674       | 0.2492  |
| Error                                                                     | 0.0002            | 6.0000               | 0.0000         |              |         |
| Total                                                                     | 0.0004            | 8.0000               |                |              |         |
| <b>Tukey HSD Results</b>                                                  |                   |                      |                |              |         |
| Treatments                                                                | Tukey HSD         | Tukey HSD            | Tukey HSD      |              |         |
| Pair                                                                      | Q statistic       | p-value              | inference      |              |         |
| B1 Vs B2                                                                  | 0.8061            | 0.8279675            | insignificant  |              |         |
| B1 Vs B3                                                                  | 1.7912            | 0.4627592            | insignificant  |              |         |
| B2 Vs B3                                                                  | 2.5973            | 0.2364134            | insignificant  |              |         |

Table S2: Growth of *Fremyella diplosiphon* SF-33 grown in 20 L bioreactors: Outdoor 15 L culture on day 15.

| <i>Descriptive statistics of your k=3 independent treatments:</i> |                      |              |              |              |              |
|-------------------------------------------------------------------|----------------------|--------------|--------------|--------------|--------------|
|                                                                   | chlorophyll <i>a</i> |              |              |              |              |
| Beginning                                                         | Treatment            | Bioreactor 1 | Bioreactor 2 | Bioreactor 3 | Pooled Total |
|                                                                   | Observations N       | 3            | 3            | 3            | 10           |
|                                                                   | Sum                  | 0.170        | 0.127        | 0.077        | 0.374        |
|                                                                   | Mean                 | 0.043        | 0.042        | 0.026        | 0.037        |
|                                                                   | Sum Of Squares       | 0.009        | 0.006        | 0.002        | 0.018        |
|                                                                   | Sample Variance S    | 0.001        | 0.001        | 0.000        | 0.000        |
|                                                                   | Sample Std. Dev. S   | 0.025        | 0.021        | 0.013        | 0.020        |
|                                                                   | Std. Dev. Of Mean    | 0.012        | 0.012        | 0.008        | 0.006        |
| End                                                               | Observations N       | 3            | 3            | 3            | 9            |
|                                                                   | Sum                  | 0.033        | 0.036        | 0.060        | 0.129        |
|                                                                   | Mean                 | 0.011        | 0.012        | 0.020        | 0.014        |
|                                                                   | Sum Of Squares       | 0.000        | 0.000        | 0.001        | 0.002        |
|                                                                   | Sample Variance S    | 0.000        | 0.000        | 0.000        | 0.000        |
|                                                                   | Sample Std. Dev. S   | 0.004        | 0.003        | 0.005        | 0.006        |
|                                                                   | Std. Dev. Of Mean    | 0.002        | 0.002        | 0.003        | 0.002        |

| Beginning  |                   |                      |                |             |         |                 |                       |                      |                       |
|------------|-------------------|----------------------|----------------|-------------|---------|-----------------|-----------------------|----------------------|-----------------------|
| Source     | sum of squares SS | degrees of freedom v | mean square MS | F statistic | p-value | treatments pair | Tukey HSD Q statistic | Tukey HSD p-value    | Tukey HSD inference   |
| Treatm ent | 0.0012            | 2                    | 0.0006         | 2.7311      | 0.1434  | CB1 vs CB2      | 1.378                 | 0.615                | insignificant         |
| Error      | 0.0014            | 6                    | 0.0002         |             |         | CB1 vs BC3      | 3.291                 | 0.127                | insignificant         |
| Total      | 0.0026            | 8                    |                |             |         | BC2 vs CB2      | 1.913                 | 0.421                | insignificant         |
| End        |                   |                      |                |             |         |                 |                       |                      |                       |
| Source     | sum of squares SS | degrees of freedom v | mean square MS | F statistic | p-value | treatments pair | Tukey HSD Q statistic | Tukey I- ISD p-value | Tukey I-ISD inference |
| Treatm ent | 0.0001            | 2                    | 0.0001         | 4.38        | 0.0672  | CB1 vs CB2      | 0.4243                | 0.9000               | insignificant         |
| Error      | 0.0001            | 6                    | 0.0000         |             |         | CB1 vs BC3      | 3.8184                | 0.0789               | insignificant         |
| Total      | 0.0002            | 8                    |                |             |         | BC2 vs CB2      | 3.3941                | 0.1156               | insignificant         |

Table S3: *Fremyella diplosiphon* chlorophyll *a* quantification from 15 L bioreactor cultures at the beginning of culture and on day 15

| <i>Descriptive statistics of your k=3 independent treatments:</i> |                    |              |              |              |              |
|-------------------------------------------------------------------|--------------------|--------------|--------------|--------------|--------------|
| Phycocyanin                                                       |                    |              |              |              |              |
| Beginning                                                         | Treatment          | Bioreactor 1 | Bioreactor 2 | Bioreactor 3 | Pooled Total |
|                                                                   | observations N     | 3            | 3            | 3            | 9            |
|                                                                   | sum                | 39338        | 42049        | 42773        | 124160       |
|                                                                   | mean               | 13113        | 14016        | 14258        | 13796        |
|                                                                   | sum of squares     | 516484254    | 589747445    | 610217821    | 1716449520   |
|                                                                   | sample variance s  | 329086       | 187322       | 187322       | 449168       |
|                                                                   | sample std. dev. s | 574          | 433          | 433          | 670          |
|                                                                   | std. dev. of mean  | 331          | 250          | 250          | 223          |
| End                                                               | observations N     | 3            | 3            | 3            | 9            |
|                                                                   | sum                | 62884        | 63253        | 63681        | 189818       |
|                                                                   | mean               | 20961        | 21084        | 21227        | 21091        |
|                                                                   | sum of squares     | 1318133670   | 1333766485   | 1351858913   | 4003759068   |
|                                                                   | sample variance s  | 592          | 59574        | 51163        | 41090        |
|                                                                   | sample std. dev. s | 24           | 244          | 226          | 203          |
|                                                                   | std. dev. of mean  | 14           | 141          | 131          | 68           |

| <i>One-way ANOVA of your k=3 independent treatments:</i> |                   |                      |                |             |         | <b>Tukey HSD results</b> |                       |                   |                     |
|----------------------------------------------------------|-------------------|----------------------|----------------|-------------|---------|--------------------------|-----------------------|-------------------|---------------------|
| Beginning                                                |                   |                      |                |             |         |                          |                       |                   |                     |
| source                                                   | sum of squares SS | degrees of freedom v | mean square MS | F statistic | p-value | Treatments pair          | Tukey HSD Q statistic | Tukey HSD p-value | Tukey HSD inference |
| Treatment                                                | 2,185,880         | 2.0                  | 1,092,940      | 4.6592      | 0.0601  | B1 vs B2                 | 3.2317                | 0.134             | insignificant       |
| Error                                                    | 1,407,462         | 6.0                  | 234,577        |             |         | B1 vs B3                 | 4.0947                | 0.062             | insignificant       |
| Total                                                    | 3,593,342         | 8.0                  |                |             |         | B2 vs B3                 | 0.863                 | 0.807             | insignificant       |
| End                                                      |                   |                      |                |             |         |                          |                       |                   |                     |
| source                                                   | sum of squares SS | degrees of freedom v | mean square MS | F statistic | p-value | treatments pair          | Tukey HSD Q statistic | Tukey HSD p-value | Tukey HSD inference |
|                                                          |                   |                      |                |             |         | B1 vs B2                 | 1.1059                | 0.716             | insignificant       |
| treatment                                                | 106,061           | 2                    | 53,030         | 1.429       | 0.3108  | B1 vs B3                 | 2.3887                | 0.284             | insignificant       |
| error                                                    | 222,659           | 6                    | 37,109         |             |         | B2 vs B3                 | 1.2827                | 0.650             | insignificant       |
| total                                                    | 328,720.8         | 8                    |                |             |         |                          |                       |                   |                     |

Table S4: *Fremyella diplosiphon* phycobiliprotein phycocyanin quantification from 15 L bioreactor cultures at the beginning of culture and on day 15.
